# Supplementary material for: Experimentally Determined Solute Mixing under Laminar and Transitional Flows at Junctions in Water Distribution Systems
Source: Hindawi journal article supplement (doi:10.1155/2019/3686510), 2019-01-01
Supplement: f1 [file 3686510.f1.zip]

Archive with 3 entries (3 files):
- 3686510.f1/Re=1,500.mp4
- 3686510.f1/Re=2,500.mp4
- 3686510.f1/Re=500.mp4
